# Supplementary material for: Increases in the longevity of desiccation-phase developing rice seeds: response to high-temperature drying depends on harvest moisture content
Source: PubMed Central journal article supplement (PMC4512194; doi:10.1093/aob/mcv091), 2015-07-01

## SUPPLEMENTARY DATA

**Fig. S1.** Ability to germinate during storage at 45°C and a m.c. of 10.9% for seeds of 20 rice accessions dried immediately in the dryroom (DR) or initially dried in the batch dryer for 1 (BD1), 2 (BD2), 3 (BD3), 4 (BD4), 5 (BD5) or 6 (BD6) days. Eqn (1) or Eqn (2) were fitted to the data with or without parameter constraints; the results shown are for the model with the fewest parameters that could be fitted without a significant increase in residual deviance compared with the best-fit model (see Appendix in main text).

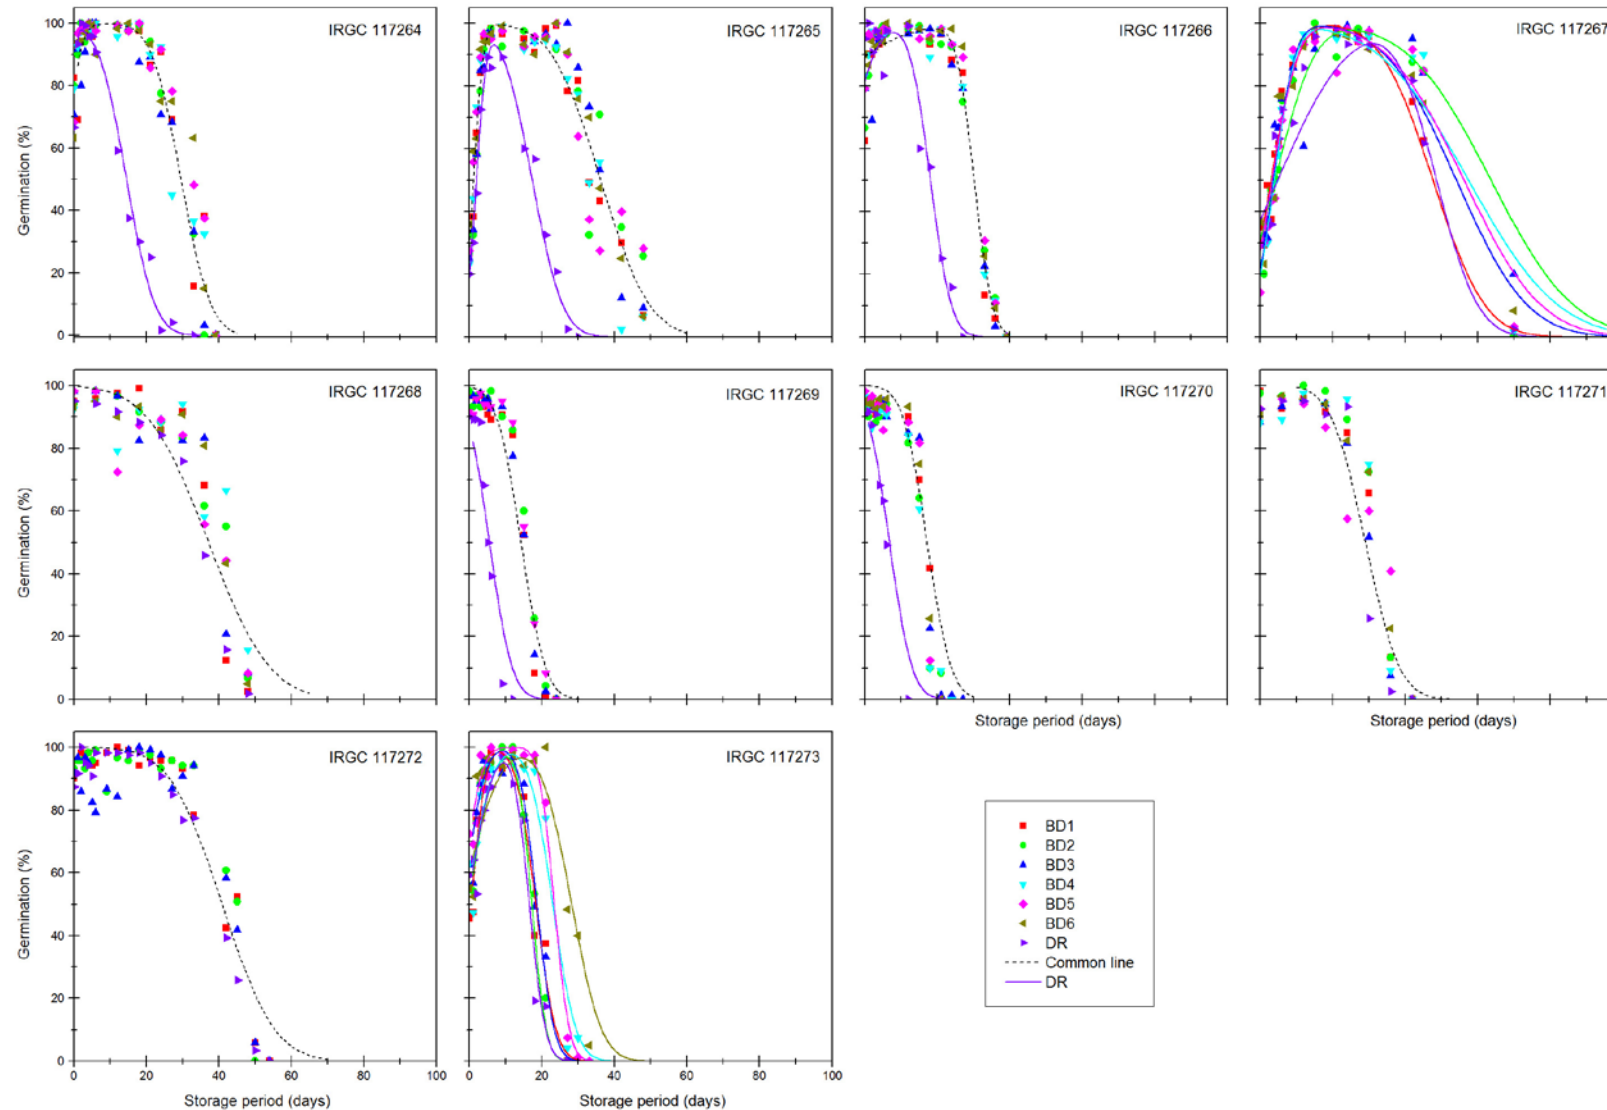

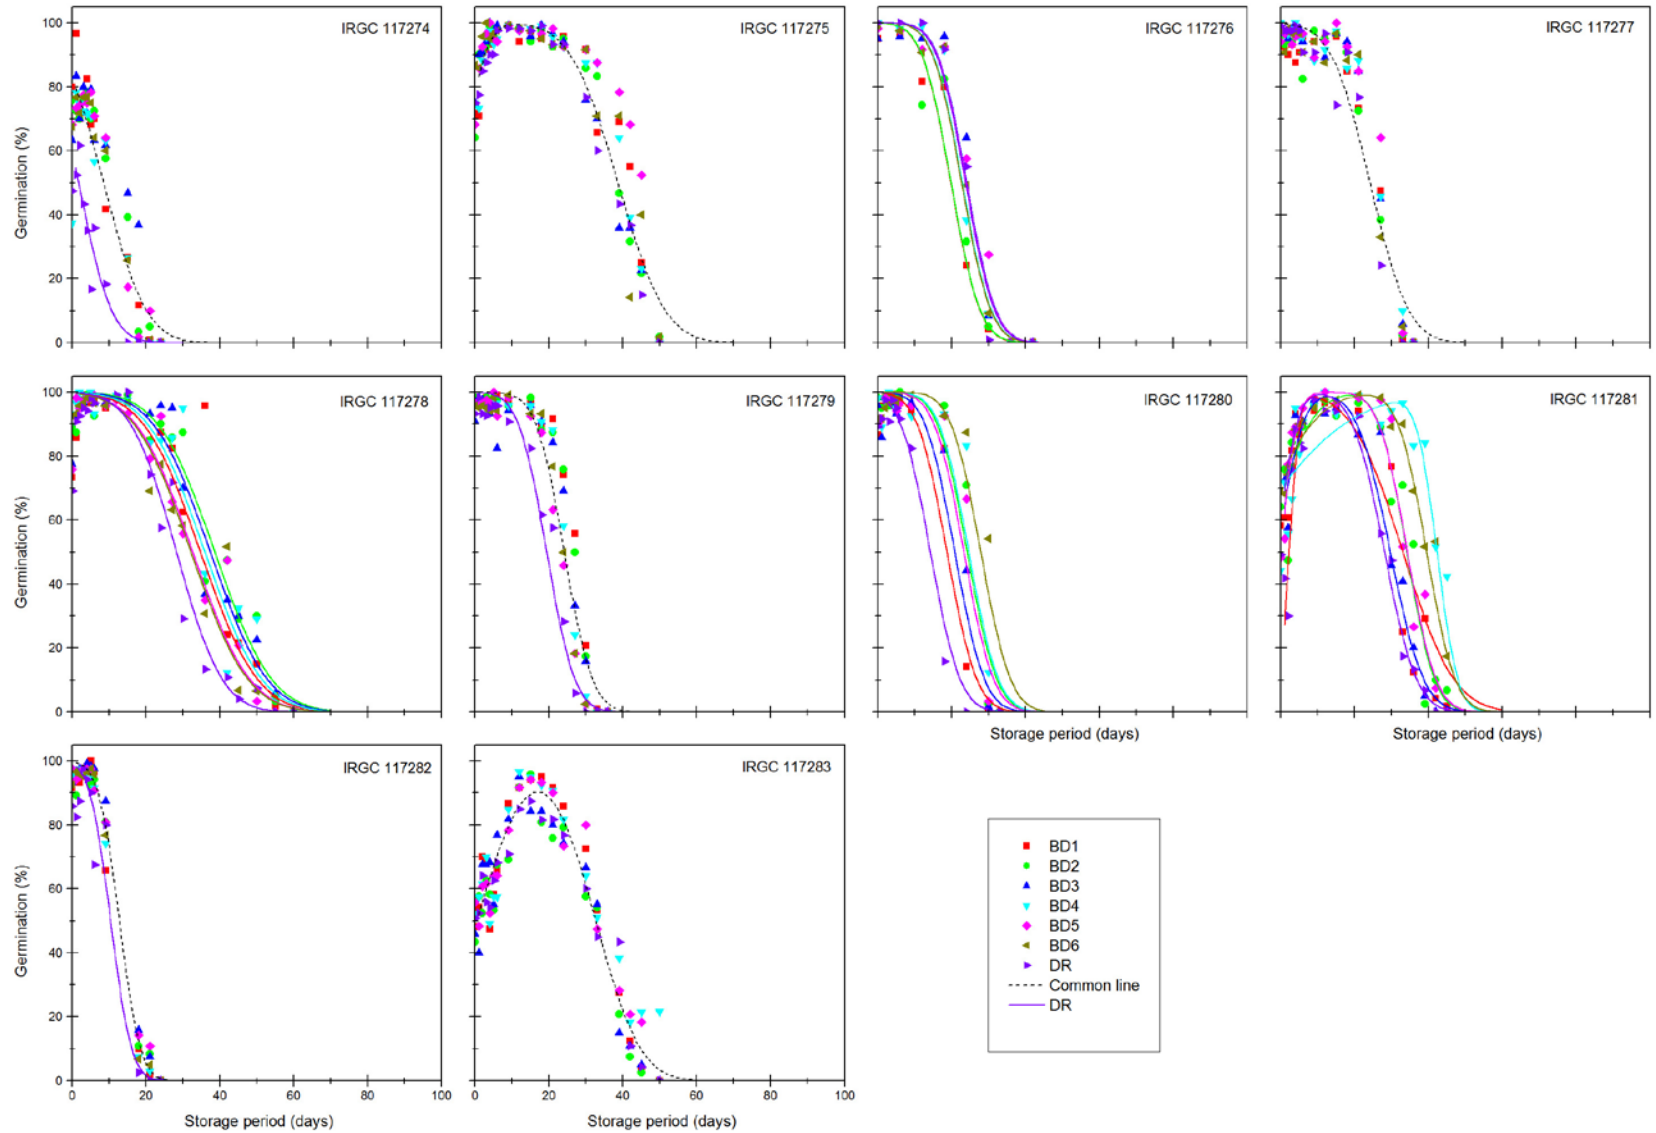

Supplement: supp_mcv091_aob-15239-s01.pdf [file supp_mcv091_aob-15239-s01.pdf]
